# Supplementary material for: Solid-State NMR-Based Metabolomics Imprinting Elucidation in Tissue Metabolites, Metabolites Inhibition, and Metabolic Hub in Zebrafish by Chitosan
Source: MDPI journal article supplement (doi:10.3390/metabo12121263), 2022-12-14
Supplement: s1 [file s1]

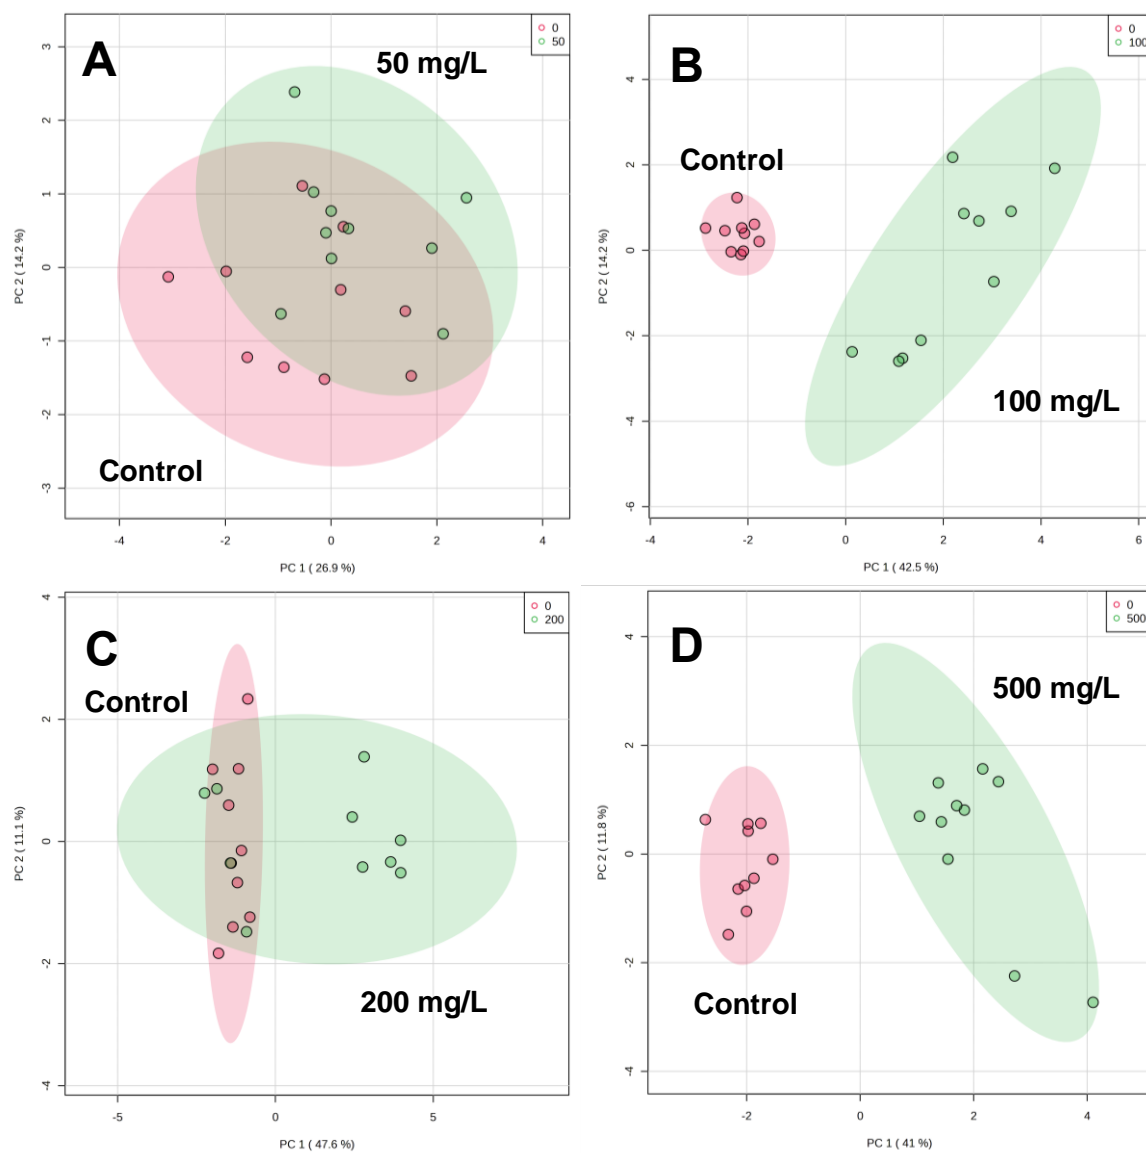

**Figure S1.** PCA with five principal components models generated from the NMR metabolomics data set. Zebrafish were treated with chitosan (green dot) and control (red dot) Ellipses represent a 95% confidence limit of the normal distribution of each cluster.
